# Supplementary material
Source: PubMed Central journal article supplement (PMC2630087)
Supplement: 0811683106_0811683106SI.pdf [file 0811683106_0811683106SI.pdf]

# Supporting Information

Pertry *et al.* 10.1073/pnas.0811683106

## SI Methods

**Purification of Recombinant Cytokinin Oxidase/Dehydrogenases (CKXs).** Six *AtCKX* cDNAs were amplified by PCR without their signal sequences with the primers listed in Table S3 and cloned into the *AvrII*-linearized vector pGAPZ $\alpha$ ::His<sub>(9)</sub> (Invitrogen) with the corresponding restriction enzymes (see Table S3). The constructs were subsequently stabilized into *Pichia pastoris* strain X33 by homologous recombination (1), and, as such, the genes were constitutively expressed from the strong *GAPDH* promoter.

The recombinant yeast strains were cultivated in YNB media buffered to pH 6.7 by potassium phosphate, supplemented with 2% glucose, at 28 °C with orbital shaking at 230 rpm for 3 to 5 days. The cells were removed by centrifugation at 15,000  $\times$  *g* and the pH of the cell-free medium was adjusted to pH 8.0 with 1 M Tris-base. The cell-free medium was concentrated to  $\approx$ 60 mL by ultrafiltration on a MiniKros Sampler Module (Spectrum) with a 10-kDa cut-off. Ultrafiltration was repeated 3 times to substitute the buffered media for 50 mM Tris-HCl, pH 8.0, supplemented with 20% ammonium sulfate. The concentrated proteins were loaded on an octyl-Sepharose CL-4B hydrophobic column (GE-Healthcare) connected to a BioLogic LP liquid chromatograph equipped with UV and conductivity detectors (Bio-Rad). After applying the sample, the column was washed with a decreasing step-gradient of ammonium sulfate and the eluate

was fractionated. The fractions with enzymatic activity were pooled and concentrated with a stirred ultrafiltration cell (Millipore) equipped with a YM 10 membrane (10-kDa cut-off). The concentrated sample was applied onto a Bio-gel hydroxyapatite (Bio-Rad) column equilibrated with 10 mM potassium phosphate buffer (pH 7.7). The proteins were eluted by a linear gradient of 10 mM and 1 M of potassium phosphate buffers (pH 7.7). Active fractions were concentrated to 2 mL and the buffer was replaced by 50 mM potassium phosphate (pH 7.4) containing 0.5 M NaCl with the ultra-filtration device. All CKX samples were finally purified on a Ni Sepharose HP (GE-Healthcare) equilibrated with 50 mM potassium phosphate buffer (pH 7.4) containing 0.5 M NaCl. His-tagged proteins were washed from the column by imidazole-containing (10 to 50 mM) loading buffer. Concentrated CKX proteins were checked for purity by SDS/PAGE followed by Western blotting with antibodies raised against barley CKX1 or CKX2 proteins. After purification, CKX proteins showed 20–80% homogeneity.

The CK dehydrogenase enzyme assay was based on the decolorization of the electron acceptor ferricyanide (500  $\mu$ M) at 420 nm and normalized as other dehydrogenases (2). The reaction mixture contained 100 mM McIlvaine buffer, pH 6.0, and 50  $\mu$ M CK substrate. The oxidase assay (3) could not be done for the *cis*-derivatives, due to cyclization of the degradation product (4).

1. Cregg JM, Barringer KJ, Hessler AY (1985) *Pichia pastoris* as a host system for transformations. *Mol Cell Biol* 5:3376–3385.
2. Appleby CA, Morton RK (1959) Lactic dehydrogenase and cytochrome b2 of baker's yeast. *Biochem J* 71:492–499.
3. Frébert I, *et al.* (2002) Cytokinin oxidase/cytokinin dehydrogenase assay: Optimized procedures and applications. *Anal Biochem* 306:1–7.

4. Galuszka P, *et al.* (2007) Biochemical characterization of cytokinin oxidases/dehydrogenases from *Arabidopsis thaliana* expressed in *Nicotiana tabacum* L. *J Plant Growth Regul* 26:255–267.

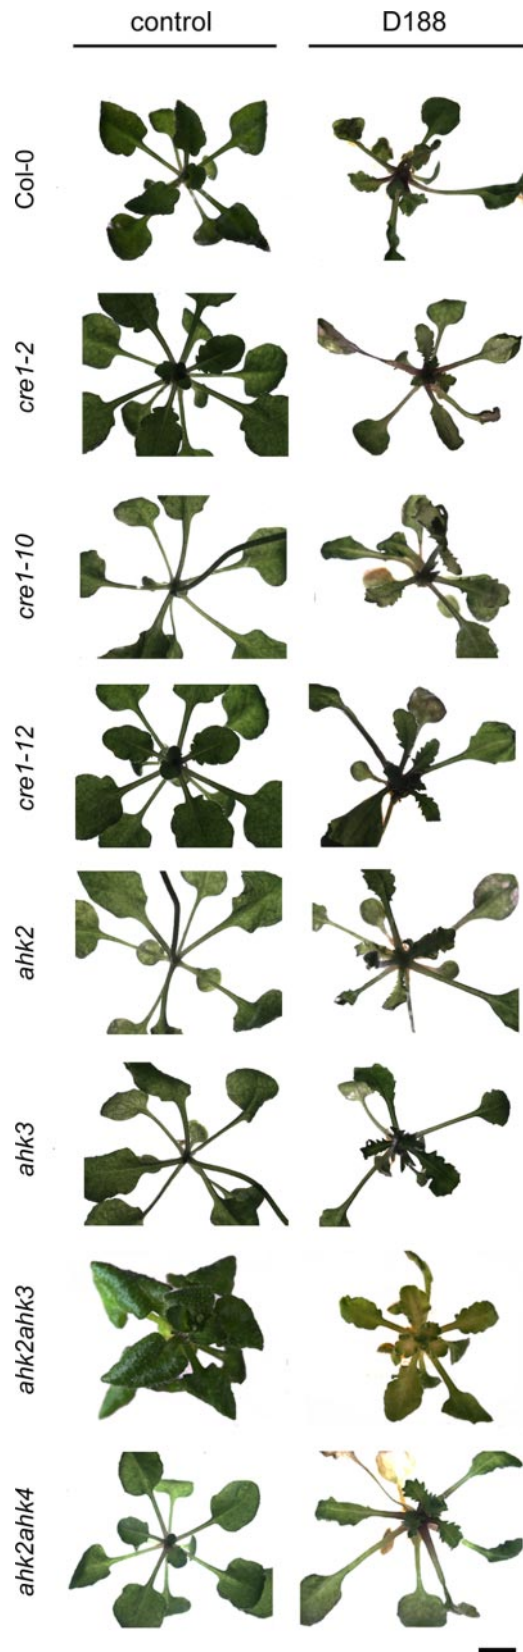

**Fig. S1.** Response of single and double CK receptor mutants upon mock inoculation and infection with *R. fascians* D188 at 17 days post infection (dpi). Images were taken at the same magnification (Scale bar, 1 cm.).









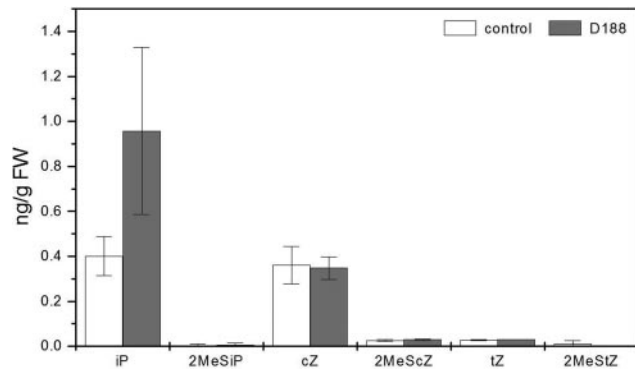

**Fig. S6.** Cytokinin profiles in mock inoculated (control) tobacco plants and leafy galls induced upon *R. fascians* D188 infection. Measurements were performed 4 weeks post infection. Error bars represent SDs ( $n = 3$ ).

**Table S1. Substrate specificity of apoplastic CKX enzymes of *Arabidopsis* in dehydrogenase (ferricyanide, FC) and oxygen (O<sub>2</sub>) mode at pH 6.0 given as absolute activities (pkat/mg)**

| Substrate | CKX2 |                | CKX4 |                | CKX6 |                |
|-----------|------|----------------|------|----------------|------|----------------|
|           | FC   | O <sub>2</sub> | FC   | O <sub>2</sub> | FC   | O <sub>2</sub> |
| iP        | 250  | 2.7            | 47.4 | 0.29           | 750  | 6.1            |
| 2MeSiP    | 72   | 0.5            | 22.9 | 0.15           | 403  | 1.3            |
| cZ        | 23   | —              | 11.2 | —              | 262  | —              |
| 2MeScZ    | 5    | —              | 4.5  | —              | 130  | —              |
| tZ        | 75   | 3.0            | 39.4 | 0.28           | 224  | 3.4            |
| 2MeStZ    | 130  | 0.4            | 8.1  | 0.11           | 318  | 4.2            |

All data represent mean values of at least two biological replicates. Deviations between replicates did not exceed 10%; dashes, oxidative degradation of *cis*-derivatives cannot be determined (see *Materials and Methods*).



**Table S2. Substrate specificity of the vacuolar CKX enzymes and CKX5 of *Arabidopsis* in dehydrogenase (FC) and oxygen (O<sub>2</sub>) mode at pH 6.0 given as absolute (pkat/mg) and relative activities**

| Substrate | CKX1    |     |                |     | CKX3    |     |                |     | CKX5    |     |                |     |
|-----------|---------|-----|----------------|-----|---------|-----|----------------|-----|---------|-----|----------------|-----|
|           | FC      |     | O <sub>2</sub> |     | FC      |     | O <sub>2</sub> |     | FC      |     | O <sub>2</sub> |     |
|           | pkat/mg | %   | pkat/mg        | %   | pkat/mg | %   | pkat/mg        | %   | pkat/mg | %   | pkat/mg        | %   |
| iP        | 2,332   | 100 | 8.2            | 100 | 466     | 100 | 15.7           | 100 | 500     | 100 | 36             | 100 |
| 2MeSiP    | 3,597   | 154 | 5.8            | 71  | 508     | 109 | 13.8           | 88  | 529     | 106 | 15             | 42  |
| cZ        | 3,306   | 142 | —              | —   | 0.5     | 0.1 | —              | —   | 191     | 38  | —              | —   |
| 2MeScZ    | 3,742   | 160 | —              | —   | 5.5     | 1.2 | —              | —   | 437     | 87  | —              | —   |
| tZ        | 3,178   | 136 | 41.6           | 507 | 93      | 20  | 3.1            | 20  | 158     | 32  | 40             | 111 |
| 2MeStZ    | 3,838   | 165 | 23.7           | 289 | 513     | 110 | 5.0            | 32  | 482     | 96  | 79             | 219 |

All data represent mean values of at least 2 biological replicates. Deviations between replicates did not exceed 10%; dashes, oxidative degradation of *cis*-derivatives cannot be determined (see *Materials and Methods*). The sequence of CKX5 suggests an apoplastic localization, although this has not been experimentally proved. The phenotype of plants overexpressing CKX5 resembles that of plants overexpressing vacuolar CKX genes (T.S., unpublished results), and the substrate specificity of CKX5 is more similar to that of the vacuolar CKX enzymes. Therefore, CKX5 was not included in Table 1 and Table S1.

**Table S3. Primer sequences used for PCR cloning of the *AtCKX* cDNAs into *Pichia* transformation vectors**

| Gene | Primer sequence 5' to 3' end direction | Restriction site |
|------|----------------------------------------|------------------|
| CKX1 | tccccgcgGTTCCAATCATTCTGTTAG            | SacII            |
|      | acgcgtcgacTTATACAGTTCTAGG              | Sall             |
| CKX2 | ggaattccatagATTAATAATTGATTTACCTAAAT    | NdeI             |
|      | gctctagaTCAAAAGATGTCTTGCCC             | XbaI             |
| CKX3 | gtccatagTCACACAACGAATTCGC              | NdeI             |
|      | cggggtaccCTAACTCGAGTTTATTTTTGA         | Asp718           |
| CKX4 | tccccgcgCAGATGAGGGCATTGATG             | SacII            |
|      | gctctagaTTAATTAATATGTC                 | XbaI             |
| CKX5 | gtccatagGTGGGTCTAAACGTG                | NdeI             |
|      | ggggtaccTCACCATGAAGCCGC                | Asp718           |
| CKX6 | gctctagaTCATGAGTATGAGACTGCCTTTTG       | XbaI             |
|      | tccccgcgGCTTCTCTAGCAGCATTC             | SacII            |
